# Supplementary material
Source: MDPI journal article supplement (https://www.mdpi.com/2227-9040/11/1/24)
Supplement: s1 [file s1]

## SUPPORTING INFORMATION

# Advanced Mapping of Optically-Blind and Optically-Active Nitrogen Chemical Impurities in Natural Diamonds

Sergey Kudryashov <sup>1,\*</sup>, Elena Rimskaya <sup>1</sup>, Evgeny Kuzmin <sup>1</sup>, Galina Kriulina <sup>1,2</sup>, Victoria Pryakhina <sup>3</sup>,  
Andrey Muratov <sup>1</sup>, Roman Khmel'nitskii <sup>1</sup>, Evgeny Greshnyakov <sup>3</sup>, Pavel Danilov <sup>1</sup> and Vladimir Shur <sup>3</sup>

**Table S1. Characterization of coloured diamonds**

| Sample              | Image                                                                               | Size d, mm |
|---------------------|-------------------------------------------------------------------------------------|------------|
| 1784-8-1<br>(IaAB)  |    | 1          |
| 1784-31-1<br>(IaAB) |   | 1          |
| EV-8-5 (IaB)        |  | 4          |
| GK_4 (IaAB)         |  | 6.4        |
| EV-8-32 (IaAB)      |  | 3          |

EV-8-39 (IaAB)

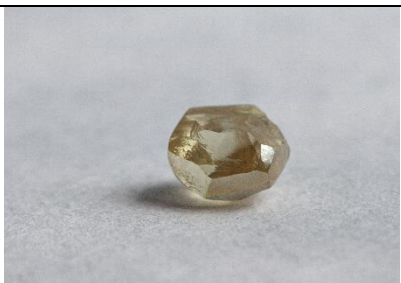

3
